# Supplementary material
Source: PubMed Central journal article supplement (PMC4601197)

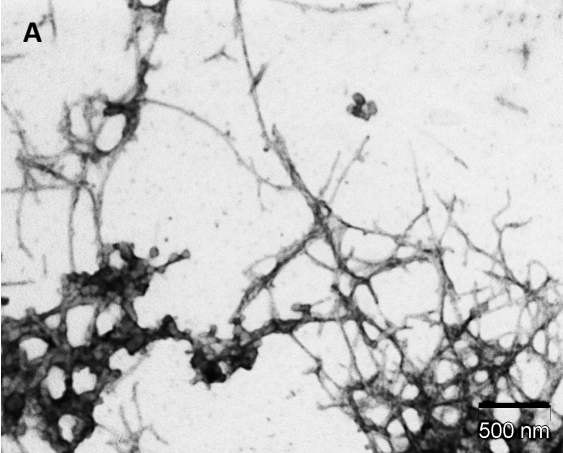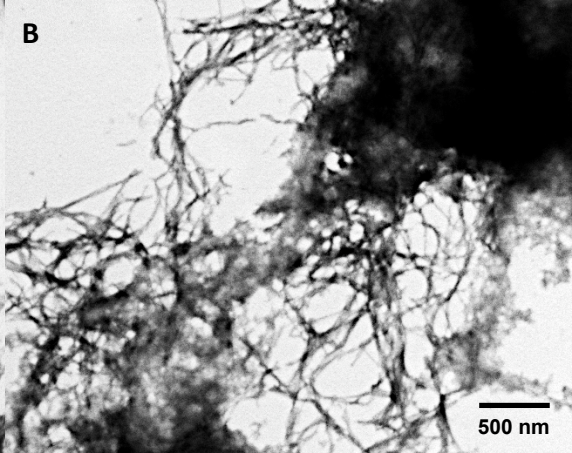

Supplement: kprn-08-03-968464-s002.pdf [file kprn-08-03-968464-s002.pdf]
